# Supplementary material
Source: HighWire-hosted journal article supplement (http://www.qdcxjkg.com/highwire/filestream/113928/field_highwire_adjunct_files/0/clarenbach_et_al_copd_and_endothelial_function_onlinesuppl_r1_5_12_2012.pdf)
Supplement: clarenbach_et_al_copd_and_endothelial_function_onlinesuppl_r1_5_12_2012.pdf [file clarenbach_et_al_copd_and_endothelial_function_onlinesuppl_r1_5_12_2012.pdf]

# Determinants of endothelial function in patients with COPD

Christian F Clarenbach, Oliver Senn, Noriane A Sievi, Giovanni Camen, Arnoldus JR van Gestel, Valentina A Rossi, Milo A. Puhan, Robert Thurnheer, Erich W Russi, Malcolm Kohler

## Online supplement

### Determination of Interleukin-6 and Malondialdehyde and blood gases

IL-6 and malondialdehyde were measured with commercially available ELISA kits Blood gas analysis was performed with an ABL 700 series blood gas analyzer (Radiometer Copenhagen).

| Type ELISA Kit                        | Brand  | Category Number |
|---------------------------------------|--------|-----------------|
| Human IL-6 high sensitivity ELISA Kit | Bender | BMS213HS        |
| Human Malondialdehyde ELISA Kit       | Hölzel | E01M0023        |

| Limits of quantification and detection | IL-6 (pg/ml) | Malondialdehyde (nmol/ml) |
|----------------------------------------|--------------|---------------------------|
| Upper Limit of Quantitation            | 9.900        | 47.846                    |
| Lower Limit of Quantitation            | 0.772        | 0.480                     |
| Lower Limit of Detection               | 0.255        | 0.158                     |

### Assessment of cardiovascular risk

A cardiovascular risk score (Pocock-score) was used to objectively assess an individuals' 5-year risk of death due to cardiovascular events [1]. The Pocock risk score is calculated from 11 known cardiovascular risk factors including age, sex, smoking status, systolic blood pressure, cholesterol, creatinine and height as well as information on the presence of diabetes, previous stroke, previous myocardial infarction and left myocardial hypertrophy. The risk score is an integer, with points added for each factor according to its association with risk.

## References

1 Pocock SJ, McCormack V, Gueyffier F, Boutitie F, Fagard RH, Boissel JP. A score for predicting risk of death from cardiovascular disease in adults with raised blood pressure, based on individual patient data from randomised controlled trials. *BMJ* 2001; 323:75-81.
